# Supplementary material for: Dietary fat proportionately enhances oxidative stress and glucose intolerance followed by impaired expression of the genes associated with mitochondrial biogenesis
Source: Royal Society of Chemistry journal article supplement (doi:10.1039/c6fo01326k), 2017-01-01
Supplement: c6fo01326k1.pdf [file c6fo01326k1.pdf]

**Dietary fat proportionately enhances oxidative stress and glucose intolerance followed by impaired expression of genes associated with mitochondrial biogenesis**

Nabanita Das<sup>1\*</sup>, Ashok Mandala<sup>1,2\*</sup>, Sudarshan Bhattacharjee<sup>1</sup>, Debasri Mukherjee<sup>3</sup>,  
Debasish Bandyopadhyay<sup>3</sup> and Sib Sankar Roy<sup>1,2#</sup>

**Supplementary Tables:**

| PARAMETERS            | CONTROL      | 30%FAT     | 45%FAT      | 60%FAT       |
|-----------------------|--------------|------------|-------------|--------------|
| Weight(gm)            | 173.75±23.04 | 268±22.67  | 331.25±8.26 | 306.67±10.22 |
| Blood glucose (mg/dl) | 76±4.505     | 92.5±2.5   | 79.09±3.59  | 75.29±0.98   |
| ALT(IU/L)             | 13.95±3.20   | 19.55±2.33 | 21.79±1.69  | 19.05±0.62   |

**(A) 4weeks of feeding with diets containing different calories of fat**

| PARAMETERS            | CONTROL      | 30%FAT      | 45%FAT       | 60%FAT      |
|-----------------------|--------------|-------------|--------------|-------------|
| Weight(gm)            | 213.33±24.03 | 312.5±13.15 | 382.5±9.14** | 358±8.22**  |
| Blood glucose (mg/dl) | 84.33±5.33   | 95.5±8.15   | 118.13±4.45* | 117.5±4.87* |
| ALT(IU/L)             | 14.38±1.98   | 19.98±0.22  | 27.34±2.46   | 19.29±2.08  |

**(B) 8weeks of feeding with diets containing different calories of fat**

| PARAMETERS            | CONTROL      | 30%FAT     | 45%FAT       | 60%FAT       |
|-----------------------|--------------|------------|--------------|--------------|
| Weight(gm)            | 223.33±12.01 | 387.5±12.5 | 396.87±10.89 | 379.37±12.43 |
| Blood glucose (mg/dl) | 90.33±21.78  | 120±6.98   | 114.25±5.89* | 121.25±11.67 |
| ALT(IU/L)             | 16.26±0.20   | 19.13±0.1  | 30±2.02*     | 27.3±2.71#   |

**(C) 10weeks of feeding with diets containing different calories of fat**

| PARAMETERS            | CONTROL     | 30%FAT     | 45%FAT         | 60%FAT        | WITHDRAWAL   |
|-----------------------|-------------|------------|----------------|---------------|--------------|
| Weight(gm)            | 250±20.41   | 397.5±19.3 | 406.25±15.18** | 385±14.60*    | 378±12.84    |
| Blood glucose (mg/dl) | 93.75±14.57 | 119.5±8.11 | 140±9.34**     | 159.67±12.8** | 105.25±2.49# |
| ALT(IU/L)             | 12.44±0.2   | 20.83±0.42 | 45±0.6*        | 50±6.62**     | 16.48±1.73#  |

**(D) 12weeks of feeding with diets containing different calories of fat**

**Table1: (A-D) Estimation of weight, blood glucose, serum ALT levels in animal fed with diet containing different grades of fat during the feeding time intervals for 12weeks. \*P < 0.05, \*\*P < 0.001 vs Control. #P < 0.05 vs 60%FAT**

|                                          | <b>30% ENERGY FROM FAT</b> | <b>45% ENERGY FROM FAT</b> | <b>60% ENERGY FROM FAT</b> |
|------------------------------------------|----------------------------|----------------------------|----------------------------|
| <b>Total energy (kcal/g)<sup>2</sup></b> | 5.07                       | 4.60                       | 5.10                       |
| <b>Protein (kcal)</b>                    | 0.745(14.7%)               | 0.83(18.1%)                | 0.924(18.1%)               |
| <b>Fat (%)</b>                           | 30%                        | 46%                        | 61.6%                      |
| <b>Saturated Fatty Acids</b>             | 8.14                       | 9.05%                      | 13.68%                     |
| <b>Monounsaturated Fatty Acids</b>       | 9.9                        | 9.32%                      | 14%                        |
| <b>Cholesterol (ppm)</b>                 | 143                        | 197                        | 301                        |
| <b>Carbohydrates (kcal)</b>              | 1.62(32%)                  | 1.65(35.8%)                | 1.035(20.3%)               |

**Table2. The composition of diet (Test diet, USA) used for the study. Nutrients expressed as percent of ration on an As Fed basis. Energy (kcal/gm) - Sum of decimal fractions of protein, fat and carbohydrate x 4, 9, 4 kcal/gm respectively.**

|                                          | <b>NORMAL STANDARD CHOW</b> |
|------------------------------------------|-----------------------------|
| <b>Total energy (kcal/g)<sup>2</sup></b> | <b>3.76</b>                 |
| <b>Protein (kcal)</b>                    | <b>0.75 (20.00%)</b>        |
| <b>Fat (%)</b>                           | <b>4.80</b>                 |
| <b>Carbohydrates (kcal)</b>              | <b>2.86 (76%)</b>           |

**Table3. The composition of normal standard diet used for the study.**

| Gene   | Forward                  | Reverse                 |
|--------|--------------------------|-------------------------|
| GSTM   | GAGGATTCGTGTGGACATTCTG   | CCCTGGCTTCAGCTTCTCAA    |
| FABP12 | GGCAAGGCCTGTAGTGACCAT    | CTCTCCCAGCTTGAAGGAAATC  |
| DUOX1  | CCACCATGCTGTACATCTGTGA   | AAGGGAGGGCGACCAAAGT     |
| GGT1   | AACAGAAGGCGCTGACGTATC    | TGAGACACATCGACAACTTTGG  |
| SPP1   | TGACTTTAAGCAAGAACTCTTCAA | TCCTCGCTCTCTGCATGGT     |
| GPX2   | GAATGTGGCCTCGCTCTGA      | AGGGAAGCCGAGAACCACTAG   |
| GATM   | AGCTACAGCTTCCTCCCAAATT   | AGGGTCCCATTTCGTTGTAAGAG |
| PGC1   | AATTAACAATGGCAGGGTTTG    | AACAAACCCTGCCATTGTAA    |
| MFN1   | TGGGTTCTACGAATGCACA      | TTTCCAGCCACTGTTTTTC     |
| MFN2   | GAGAGGCGATTTGAGGAGTG     | AAGACAATAAACCCGCTGCT    |

|             |                      |                     |
|-------------|----------------------|---------------------|
| 18S<br>RRNA | GATTCCGTGGGTGGTGGTGC | AAGAAGTTGGGGGACCCGA |
|-------------|----------------------|---------------------|

**Table4. The sequences of rat specific oligonucleotides used for real time PCR during the study.**
